# Supplementary material for: Identification of complex metabolic states in critically injured patients using bioinformatic cluster analysis
Source: Springer Nature journal article supplement (doi:10.1186/cc8864), 2010-02-02

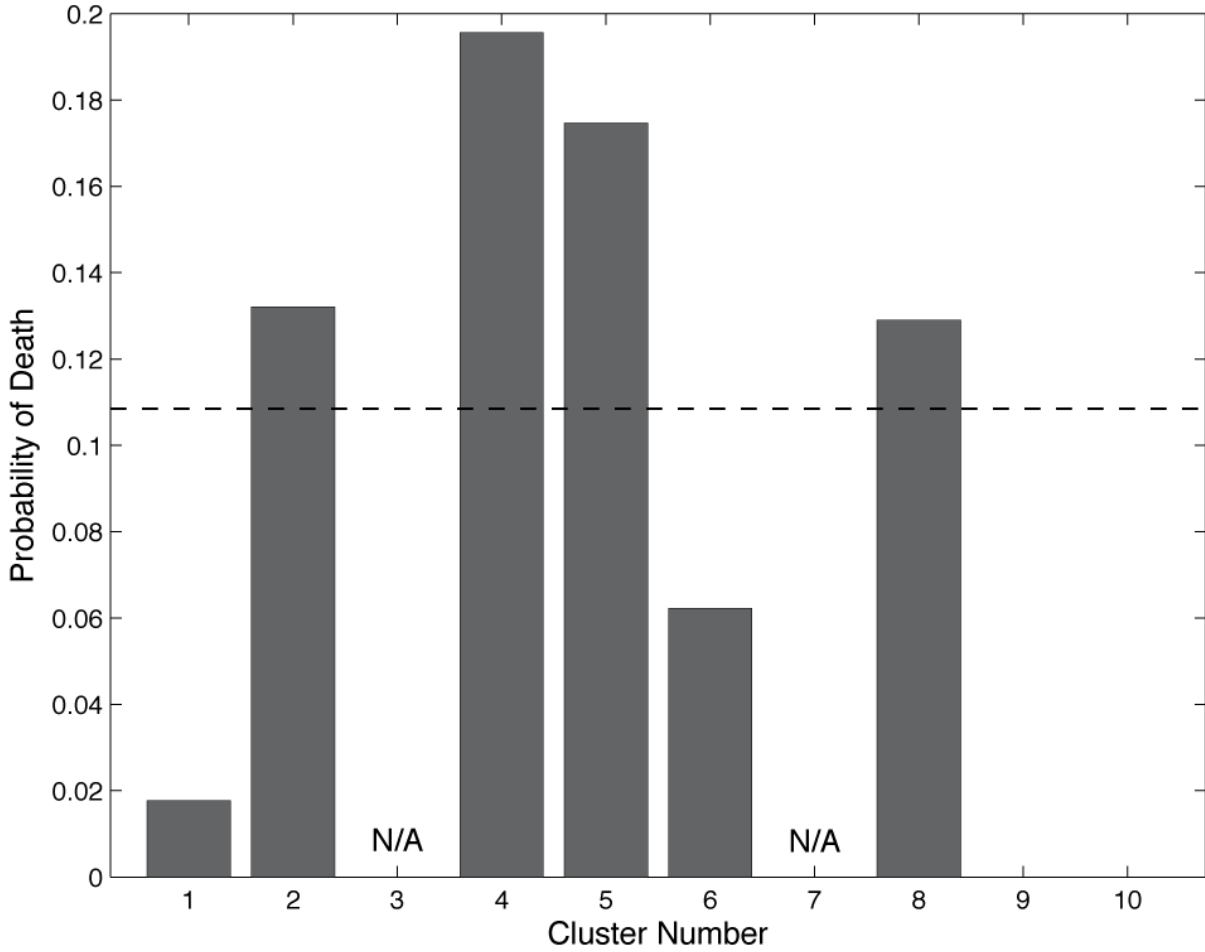

Supplement: 13054_2009_8294_MOESM2_ESM.pdf [file 13054_2009_8294_MOESM2_ESM.pdf]
